# Supplementary material
Source: publisher figshare collection journal article supplement (https://karger.figshare.com/ndownloader/files/9243076)
Supplement: Supplementary file 1 [file 9243076]

## Sheet: Supplementary1
Species	Ecotype	Sample Size: Male	Sample Size: Female	Brain (x6.4 x 10^-5 mm^3)	Telencephalon (x6.4 x 10^-5 mm^3)	Diencephalon (x6.4 x 10^-5 mm^3)	Tectum (x6.4 x 10^-5 mm^3)	Tegmentum (x6.4 x 10^-5 mm^3)	Cerebellum (x6.4 x 10^-5 mm^3)	Rhombencephalon (x6.4 x 10^-5 mm^3)	Weight (g)	Snout-vent Length (cm)	Head Length (mm)	Head Width (mm)	Interlimb Length (cm)	Upper Forelimb Length (cm)	Lower Forelimb Length (cm)	Front Toe Length (cm)	Front Palm Length (cm)	Upper Hindlimb Length (cm)	Lower Hindlimb Length (cm)	Hind Toe Length (cm)	Hind Palm Length (cm)	Tail Length (cm)	Hip Height (mm)
Ctenophorus_caudicinctus_slateri	Rock dweller	8	11	1596248	523880	161203	266404	75505	79914	314896	15.28	77.89	20.25	14.38	33.16	9.03	8.99	6.18	5.1	19.64	15.48	13.41	14.65	140.37	8.9
Ctenophorus_cristatus	Sprinter	12	8	2758058	935093	273018	425808	131255	136983	528202	35.57	107.2	26.69	17.9	48.54	12.56	13.12	7.96	6.69	28.94	22.03	21.46	22.93	222.78	12.57
Ctenophorus_decresii	Rock dweller	13	6	1671980	529882	164365	270384	84503	76579	332246	16.08	80.1	23.59	16.29	40.42	8.88	8.87	6.66	5.55	18.78	16.15	13.25	11.99	133.9	8.94
Ctenophorus_fionni	Rock dweller	11	10	1487356	501668	147198	241209	72306	69651	307969	14.93	79.71	22.73	15.87	35.76	8.24	9.05	6.52	5.24	19.1	14.62	13.38	14.14	131.4	7.63
Ctenophorus_fordi	Sprinter	10	10	698844	231750	74372	116802	34035	30479	150040	3.99	53.29	13.59	9.78	23.73	5.91	6.18	4.23	3.32	12.55	10.09	10.91	9.77	100.3	5.75
Ctenophorus_gibba	Burrower	11	8	1552422	519733	146306	267023	85578	69374	303495	15.07	74.53	20.76	15.62	37	8.89	9.53	6.84	4.79	18.37	15.16	12.05	13.42	97.68	9.86
Ctenophorus_isolepis_gularis	Sprinter	10	10	991610	327440	102535	156969	50139	45803	220220	8.19	65.95	16.75	11.8	29	7.57	7.85	5.04	3.85	16.19	13.01	13.5	13.04	128.16	7.45
Ctenophorus_nuchalis	Burrower	14	3	2232250	728576	225123	386110	101207	108802	409942	26.19	100.63	25.7	19.09	51.95	10.47	11.79	6.89	6.26	19.21	14	10.32	12.11	118.72	11.69
Ctenophorus_ornatus	Rock dweller	9	8	1773824	584423	166723	265828	84335	79461	351777	21.75	89.06	24.92	18.14	41.59	10.53	10.12	7.53	6.65	22.94	16.35	15.24	17.29	164.75	7.34
Ctenophorus_pictus	Burrower	15	13	1259516	433989	142513	211969	59890	56135	240914	9.59	69.52	19.03	14.46	33.83	7.45	7.97	5.03	4.45	14.93	12.21	10.38	11.48	105.28	8.22
Ctenophorus_rufescens	Rock dweller	10	10	1814748	613310	193489	293488	85250	84578	357297	20.44	85.35	22.72	15.54	38.4	10.65	10.2	7.5	6.05	23.65	18.15	16.6	17.45	171.71	8.02
Ctenophorus_salinarum	Burrower	10	10	1258656	442827	129304	228346	65621	52323	235272	8.84	66.45	17.8	14.02	31.3	6.65	7.75	5.05	4.45	12.95	10.75	9.6	9.65	83.1	7.44
Ctenophorus_tjantjalka	Rock dweller	12	7	1424184	502435	146597	222051	70682	65036	279520	10.56	65.9	19.93	14.15	31.59	7.67	8.12	6.15	4.74	18.11	14.41	14.16	14.51	121.33	8.18
Ctenophorus_vadnappa	Rock dweller	10	8	1583168	522877	154931	256994	73258	76692	317631	14.35	74.69	22.79	16.05	37.27	8.81	9.42	6.85	5.54	20.65	15.65	14.58	13.96	142.21	9
